# Supplementary material for: Biological Containment for African Swine Fever (ASF) Laboratories and Animal Facilities: The Italian Challenge in Bridging the Present Regulatory Gap and Enhancing Biosafety and Biosecurity Measures
Source: MDPI journal article supplement (doi:10.3390/ani14030454), 2024-01-30
Supplement: s1 [file s1]

**Table S1.** Principles of biological containment appropriate for diagnostic laboratories

|                      | Minimum requirements                                                                                                                                                                                                                                    | Additional requirements                                                                                                                                                                                                                                  |
|----------------------|---------------------------------------------------------------------------------------------------------------------------------------------------------------------------------------------------------------------------------------------------------|----------------------------------------------------------------------------------------------------------------------------------------------------------------------------------------------------------------------------------------------------------|
| General environment  | Normal atmospheric pressure.<br>Dedicated rooms limited to defined procedures.                                                                                                                                                                          | Normal atmospheric pressure.<br>Dedicated rooms, used exclusively for classical swine fever or ASF diagnostic procedures.<br>Potentially contaminated waste treated to inactivate ASF virus (heat or chemical).                                          |
| Laboratory clothing  | Dedicated outer clothing used only in the ASF virus unit.<br>Disposable gloves for all manipulations of infected material.<br>Outer clothing sterilised before removal from unit, or washed at a high temperature within unit                           | Complete change of clothes on entry.<br>Laboratory clothing used only in the ASF virus unit. Disposable gloves for all manipulations of infected material.<br>Clothing sterilised before removal from unit, or washed at a high temperature within unit. |
| Control of personnel | Entry to unit limited to named, trained personnel. Wash and disinfect hands on leaving unit.<br>Personnel not permitted to visit premises with pigs for 48 hours after leaving unit                                                                     | Entry to unit limited to named, trained personnel.<br>Wash and disinfect hands on leaving unit.<br>Personnel not permitted to visit premises with pigs for 48 hours after leaving unit.                                                                  |
| Equipment            | Biological safety cabinet (class I or II) used for all manipulations of live virus. Cabinet should have double HEPA filtration of exhaust air.<br>All equipment needed for laboratory procedures to be available within the dedicated laboratory suite. |                                                                                                                                                                                                                                                          |
